# Supplementary material
Source: publisher figshare collection journal article supplement (https://diabetesjournals.figshare.com/ndownloader/files/36135215)
Supplement: Supplementary file 1 [file 36135215]

**Appendix Table 1.** Baseline characteristics of employees, dependents, and retirees  $\geq 18$  years of age, those with prediabetes, and those with prediabetes stratified by metformin use after the invitation to participate in the National DPP or at any time.

|                                          | Total          | Prediabetes    | Metformin use after National DPP invite only | Any metformin use | p-value |
|------------------------------------------|----------------|----------------|----------------------------------------------|-------------------|---------|
| N (%)                                    | 64,131         | 8,131          | 269 (4%)                                     | 802 (10%)         | --      |
| Age (years)                              | 39 $\pm$ 14    | 50 $\pm$ 12    | 49 $\pm$ 11                                  | 48 $\pm$ 12       | 0.2135  |
| Sex                                      |                |                |                                              |                   | 0.3584  |
| Women                                    | 35,244 (55%)   | 4,649 (57%)    | 176 (65%)                                    | 549 (68%)         |         |
| Men                                      | 28,887 (45%)   | 3,482 (43%)    | 93 (35%)                                     | 253 (32%)         |         |
| Race                                     |                |                |                                              |                   | 0.3722  |
| Asian                                    | 3,382 (8%)     | 634 (10%)      | 15 (7%)                                      | 43 (7%)           |         |
| Black                                    | 2,688 (7%)     | 532 (8%)       | 22 (11%)                                     | 51 (8%)           |         |
| White                                    | 34,575 (84%)   | 5,254 (81%)    | 162 (78%)                                    | 520 (83%)         |         |
| Other                                    | 651 (2%)       | 85 (1%)        | 8 (4%)                                       | 14 (2%)           |         |
| At least 1 PCP visit in past year        | 34,574 (54%)   | 6,789 (84%)    | 217 (81%)                                    | 691 (86%)         | 0.0358  |
| At least 1 Specialist visit in past year | 29,687 (46%)   | 5,323 (66%)    | 183 (68%)                                    | 569 (71%)         | 0.3931  |
| BMI (kg/m <sup>2</sup> )                 | 28.3 $\pm$ 6.7 | 32.3 $\pm$ 7.3 | 36.6 $\pm$ 7.8                               | 36.7 $\pm$ 7.8    | 0.8758  |
| Blood pressure (mmHg)                    |                |                |                                              |                   |         |
| Systolic                                 | 120 $\pm$ 15   | 125 $\pm$ 15   | 127 $\pm$ 16                                 | 127 $\pm$ 15      | 0.8344  |
| Diastolic                                | 72 $\pm$ 10    | 75 $\pm$ 10    | 77 $\pm$ 11                                  | 77 $\pm$ 10       | 0.9033  |
| Cholesterol (mg/dl)                      |                |                |                                              |                   |         |
| Total cholesterol                        | 194 $\pm$ 38   | 194 $\pm$ 39   | 191 $\pm$ 41                                 | 190 $\pm$ 40      | 0.8240  |
| HDL                                      | 55 $\pm$ 16    | 52 $\pm$ 15    | 49 $\pm$ 13                                  | 49 $\pm$ 13       | 0.9857  |
| Women                                    | 61 $\pm$ 16    | 57 $\pm$ 15    | 52 $\pm$ 13                                  | 52 $\pm$ 13       | 0.9764  |
| Men                                      | 48 $\pm$ 13    | 46 $\pm$ 12    | 41 $\pm$ 9                                   | 42 $\pm$ 10       | 0.7693  |
| Triglycerides                            | 129 $\pm$ 88   | 147 $\pm$ 94   | 159 $\pm$ 88                                 | 160 $\pm$ 116     | 0.8875  |
| LDL                                      | 113 $\pm$ 32   | 114 $\pm$ 33   | 111 $\pm$ 35                                 | 111 $\pm$ 34      | 0.9854  |
| HbA1c (%)                                | 5.6 $\pm$ 0.6  | 5.8 $\pm$ 0.5  | 6.1 $\pm$ 0.8                                | 6.1 $\pm$ 0.9     | 0.8891  |
| Claims diagnosis of ...                  |                |                |                                              |                   |         |
| Overweight/obesity                       | 8,598 (13%)    | 2,817 (35%)    | 135 (50%)                                    | 418 (52%)         | 0.5829  |
| Hypertension                             | 8,108 (13%)    | 3,064 (38%)    | 119 (44%)                                    | 371 (46%)         | 0.5647  |
| Any antihypertensive medication          | 8,168 (13%)    | 2,865 (35%)    | 110 (41%)                                    | 376 (47%)         | 0.0877  |
| Dyslipidemia                             | 6,451 (10%)    | 2,733 (34%)    | 89 (33%)                                     | 290 (36%)         | 0.3615  |
| Any lipid lowering medication            | 3,619 (6%)     | 1,636 (20%)    | 62 (23%)                                     | 206 (26%)         | 0.3875  |
| Smoking                                  | 1,737 (3%)     | 530 (7%)       | 19 (7%)                                      | 48 (6%)           | 0.5275  |
| Women                                    | 850 (2%)       | 256 (6%)       | 10 (6%)                                      | 24 (4%)           | 0.4743  |
| Men                                      | 887 (3%)       | 274 (8%)       | 9 (10%)                                      | 24 (10%)          | 0.9572  |
| Cardiovascular disease                   | 1,917 (3%)     | 800 (10%)      | 37 (14%)                                     | 81 (10%)          | 0.0976  |
| Geocoded Indicators                      |                |                |                                              |                   |         |
| Median neighborhood income (\$)          | 70,228         | 69,751         | \$66,040                                     | \$68,487          | 0.0474  |
| Percent unemployment                     | 35.3 $\pm$ 5.0 | 35.0 $\pm$ 4.7 | 34.8 $\pm$ 4.9                               | 34.7 $\pm$ 4.7    | 0.6979  |
| Percent food stamps                      | 7.9 $\pm$ 6.0  | 8.7 $\pm$ 6.5  | 10.0 $\pm$ 7.1                               | 9.2 $\pm$ 6.3     | 0.0970  |

DPP: Diabetes Prevention Program, BMI: Body Mass Index

Data are n (%) or mean  $\pm$  standard deviation.
